# Supplementary material for: Anti-fatigue property of the oyster polypeptide fraction and its effect on gut microbiota in mice
Source: Royal Society of Chemistry journal article supplement (doi:10.1039/d0fo01713b), 2020-01-01
Supplement: d0fo01713b1.pdf [file d0fo01713b1.pdf]

## Supplementary material

Table S1 Primer sequences

| Primer<br>sequence | Forward primer                        | Reverse primer                        |
|--------------------|---------------------------------------|---------------------------------------|
| s                  |                                       |                                       |
| PEPCK              | 5'-CTGGCACCTCAGTGAAGACA-<br>3'        | 5'-TCGATGCCTTCCCAGTAAAC-<br>3'        |
| AMPK               | 5'-<br>TCCTTCATGGACGATATGGCC-3'       | 5'-<br>ATCCAGTGGACAGCGTGCTTT-3'       |
| TNF- $\alpha$      | 5'-TGAGTGAGACGCATTTCCAG-<br>3'        | 5'-CTGGAGGTAGGCACAGCTTC-<br>3'        |
| $\beta$ -actin     | 5'-<br>ACGTCGACATCCGCAAAGACCT<br>C-3' | 5'-<br>TGATCTCCTTCTGCATCCGGTC<br>A-3' |

Table S2 Effect of OP fraction on body weight of mice

| Groups  | Body weight of mice (g) |            |            |            |            |
|---------|-------------------------|------------|------------|------------|------------|
|         | 0 week                  | 1 week     | 2 weeks    | 3 weeks    | 4 weeks    |
| CONTROL | 30.61±1.36              | 37.02±1.94 | 39.87±2.36 | 42.47±2.57 | 44.12±3.11 |
| L-OP    | 29.84±1.34              | 36.74±1.43 | 39.32±1.84 | 41.48±2.51 | 42.96±2.55 |
| M-OP    | 30.49±1.42              | 37.35±2.02 | 40.18±2.64 | 42.85±3.10 | 44.78±3.44 |
| H-OP    | 30.80±1.69              | 37.96±2.74 | 40.84±3.89 | 43.54±3.80 | 45.27±4.02 |
